# Supplementary material for: Ivacaftor-Mediated Potentiation of ABCB4 Missense Mutations Affecting Critical Motifs of the NBDs: Repositioning Perspectives for Hepatobiliary Diseases
Source: MDPI journal article supplement (doi:10.3390/ijms24021236), 2023-01-08
Supplement: s1 [file s1]

# **Ivacaftor-mediated potentiation of ABCB4 missense mutations affecting critical motifs of the NBDs: repositioning perspectives for hepatobiliary diseases**

Jean-Louis Delaunay<sup>1</sup>, Ahmad Elbahnsi<sup>2</sup>, Alix Bruneau<sup>3</sup>, Claire Madry<sup>1</sup>, Anne-Marie Durand-Schneider<sup>1</sup>, Anne Stary<sup>1</sup>, Chantal Housset<sup>1,4</sup>, Jérémie Gautheron<sup>1</sup>, Isabelle Callebaut<sup>2, #</sup>, Tounsia Aït-Slimane<sup>1, \*, #</sup>

<sup>1</sup>Sorbonne Université, Inserm, Centre de Recherche Saint-Antoine (CRSA), Institute of Cardiometabolism and Nutrition (ICAN), F-75012 Paris, France.

<sup>2</sup>Sorbonne Université, Muséum National d'Histoire Naturelle, UMR CNRS 7590, Institut de Minéralogie, de Physique des Matériaux et de Cosmochimie, IMPMC, 75005, Paris, France

<sup>3</sup>Department of Hepatology & Gastroenterology, Charité Universitätsmedizin Berlin, 13353 Berlin, Germany

<sup>4</sup>Assistance Publique - Hôpitaux de Paris, Hôpital Saint-Antoine, Centre de Référence des Maladies Rares - Maladies Inflammatoires des Voies Biliaires et Hépatites auto-immunes & Service d'Hépatologie, F-75012 Paris, France.

**\* Corresponding author :** Tounsia Aït-Slimane, PhD—Sorbonne Université, Inserm, Centre de Recherche Saint-Antoine (CRSA) — 27 Rue Chaligny—75012 Paris, France.

Phone : +33 (0)1-40-01-13-56. E-mail : tounsia.ait-slimane@inserm.fr

**Supplementary Table S1. Human ABCB4 transcript variant A mutagenesis primers**

| <i>Primer name</i> | <i>Primer location</i> | <i>Primer sequence 5'→3'</i>                     | <i>Mutated nucleotide</i> | <i>Mutant amino-acid</i> |
|--------------------|------------------------|--------------------------------------------------|---------------------------|--------------------------|
| Mut 403F           | Exon 11                | GGAGTTCAATGATGTTCACTTTTCT <u>C</u> ACCCTTCTCGAGC | c. 1207 T>C               | Y403H                    |
| Mut 403R           | Exon 11                | GCTCGAGAAGGGTGAGAAAAGTGAACATCATTGAACTCC          | c. 1207 T>C               | Y403H                    |
| Mut 435F           | Exon 12                | TAGTGGCTGTGGGA <u>T</u> GAGCACAACGGTCC           | c. 1304 A>T               | K435M                    |
| Mut 435R           | Exon 12                | GGACCGTTGTGCTCATCCACAGCCACTA                     | c. 1304 A>T               | K435M                    |
| Mut 558F           | Exon 14                | CCCAAGATCCTTCTGCTGGAT <u>A</u> AGGCCACGTCA       | c. 1672 G>A               | E558K                    |
| Mut 558R           | Exon 14                | TGACGTGGCCTTATCCAGCAGAAGGATCTTGGG                | c. 1672 G>A               | E558K                    |
| Mut 564F           | Exon 14                | GCCACGTCAGCATTGGG <u>C</u> ACAGAAAGTGAAGCT       | c. 1691 A>G               | D564G                    |
| Mut 564R           | Exon 14                | AGCTTCACTTTCTGTGCCCAATGCTGACGTGGC                | c. 1691 A>G               | D564G                    |
| Mut 589F           | Exon 15                | CGGACCACCATTTGTATAGCA <u>T</u> ACCGACTGTCT       | c. 1765 C>T               | H589Y                    |
| Mut 589R           | Exon 15                | AGACAGTCGGTATGCTATCACAATGGTGGTCCG                | c. 1765 C>T               | H589Y                    |
| Mut 1043F          | Exon 25                | ATGAAGTCGTGTCAACCATCC <u>C</u> ACCCGAGCAAAC      | c. 3127 T>C               | Y1043H                   |
| Mut 1043R          | Exon 25                | GTTTGCTCGGGTGGGATGGTTGAACACGACTTCAT              | c. 3127 T>C               | Y1043H                   |
| Mut 1075F          | Exon 25                | AGTGGCTGTGGGA <u>T</u> GAGCACGGTGGTC             | c. 3224 A>T               | K1075M                   |
| Mut 1075R          | Exon 25                | GACCACCGTGCTCATCCACAGCCACT                       | c. 3224 A>T               | K1075M                   |
| Mut 1200F          | Exon 27                | AATCCTCCTGTTGGATG <u>C</u> AGCTACATCAGCTCTGG     | c. 3599 A>C               | E1200A                   |
| Mut 1200R          | Exon 27                | CCAGAGCTGATGTAGCTGCATCCAACAGGAGGATT              | c. 3599 A>C               | E1200A                   |
| Mut 1206F          | Exon 27                | GAAGCTACATCAGCTCTGGG <u>T</u> ACTGAAAGTAAAAGGTTG | c. 3617 A>G               | D1206G                   |
| Mut 1206R          | Exon 27                | CAACCTTTTCACTTTCAGTACCCAGAGCTGATGTAGCTTC         | c. 3617 A>G               | D1206G                   |
| Mut 1231F          | Exon 28                | CGCACCTGCATTGTGATTGCT <u>T</u> ACCGCCTGTCC       | c. 3691 C>T               | H1231Y                   |
| Mut 1231R          | Exon 28                | GGACAGGCGGTAAGCAATCACAATGCAGGTGCG                | c. 3691 C>T               | H1231Y                   |

The underlined nucleotide in the sequence of primers is the mutated base. F represents forward; R, reverse. Mutated nucleotide corresponds to the cDNA of the NM\_000443.3 (ABCB4, transcript variant A, mRNA).

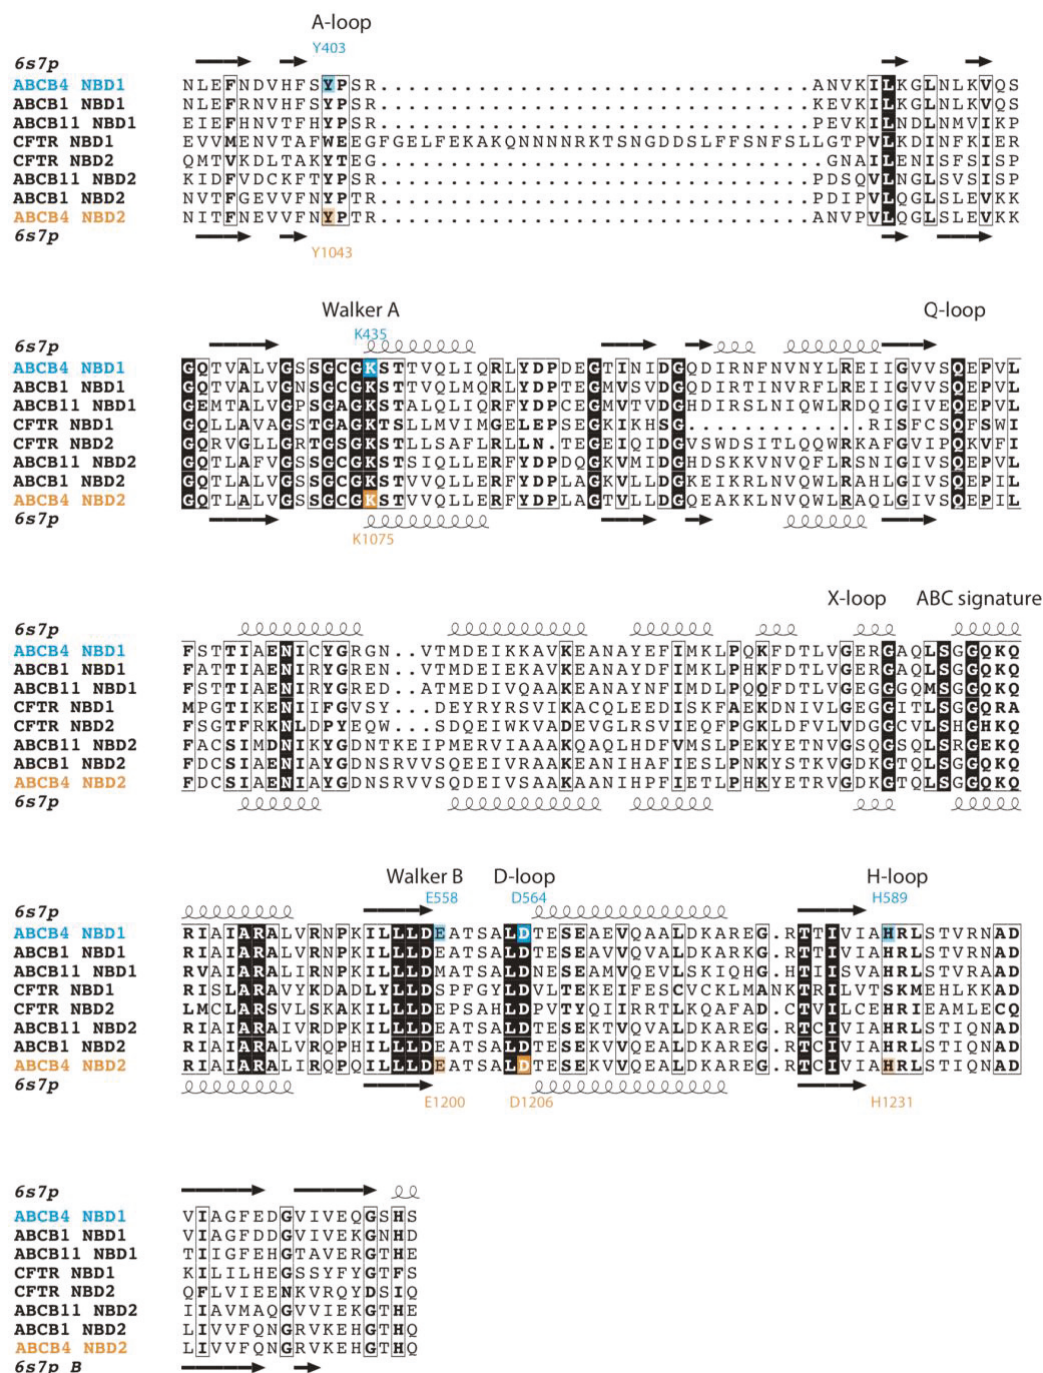

**Figure S1.** Alignment of the sequences of the nucleotide-binding domains NBD1 and NBD2 of ABCB4 (MDR3 – isoform 2, UniprotP21439-2), ABCB1 (MDR1 – isoform 1, UniprotP08183-1), ABCB11 (BSEP– isoform 1, UniprotPO95342) and CFTR (ABCC7– isoform 1, UniprotP13569). The positions of the ten ABCB4 mutants studied here are shown in blue for NBD1 and orange for NBD2. Note that ABCB4 and ABCB1 have two canonical ATP-binding sites, whereas ABCB11 and CFTR have one degenerated ATP-binding site. The figure was prepared using ESPript (Robert, X. and Gouet, P. 2014)

## Reference

Robert, X.; Gouet, P. Deciphering key features in protein structures with the new ENDscript server. *Nucleic Acids Res* **2014**, *42*, W320-4, doi: 10.1093/nar/gku316.

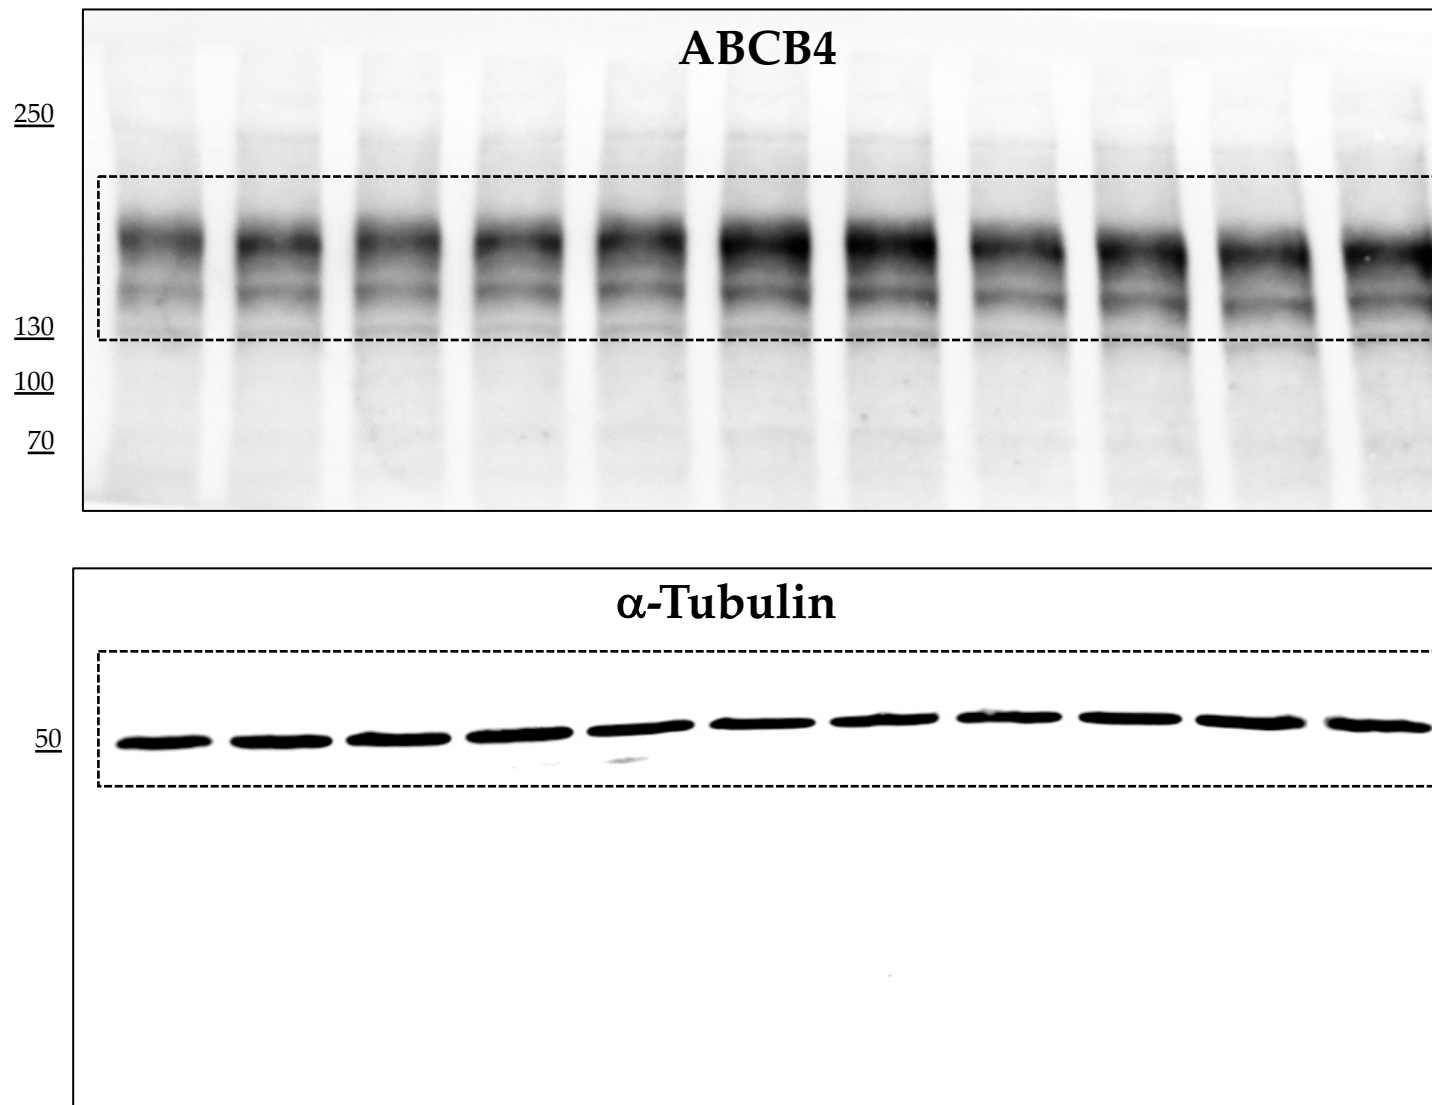

**Figure S2. Full immunoblots related to Figure 4A.** These immunoblots are representative of three independent experiments. Results shown in Figure 4A are delineated by dotted rectangles. MW (in kDa) are indicated.
